# Supplementary material
Source: MDPI journal article supplement (https://www.mdpi.com/1996-1073/14/13/3713)
Supplement: s1 [file s1]

## Supplementary Material

# Production of Fuel-Like Fractions by Fractional Distillation of Bio-Oil from Açaí (*Euterpe oleracea* Mart.) Seeds Pyrolysis

Douglas Alberto Rocha de Castro <sup>1</sup>, Haroldo Jorge da Silva Ribeiro <sup>1</sup>, Lauro Herique Hamoy Guerreiro <sup>2</sup>, Lucas Pinto Bernar <sup>1</sup>, Sami Jonatan Bremer <sup>3</sup>, Marcelo Costa Santo <sup>1</sup>, Hélio da Silva Almeida <sup>4,5</sup>, Sergio Duvoisin, Jr. <sup>6</sup>, Luiz Eduardo Pizarro Borges <sup>7</sup> and Nélío Teixeira Machado <sup>1,4,\*</sup>

**Citation:** Rocha de Castro, D.A.; da Silva Ribeiro, H.J.; Hamoy Guerreiro, L.H.; Pinto Bernar, L.; Jonatan Bremer, S.; Costa Santo, M.; da Silva Almeida, H.; Duvoisin, S., Jr.; Pizarro Borges, L.E.; Teixeira Machado, N. Production of Fuel-Like Fractions by Fractional Distillation of Bio-Oil from Açaí (*Euterpe oleracea* Mart.) Seeds Pyrolysis. *Energies* **2021**, *14*, 3713. <https://doi.org/10.3390/en14133713>

Academic Editors: Andrea Di Carlo and Elisa Savuto

Received: 8 February 2021  
Accepted: 26 April 2021  
Published: 22 June 2021

**Publisher's Note:** MDPI stays neutral with regard to jurisdictional claims in published maps and institutional affiliations.

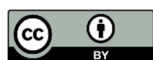

**Copyright:** © 2021 by the authors. Licensee MDPI, Basel, Switzerland. This article is an open access article distributed under the terms and conditions of the Creative Commons Attribution (CC BY) license (<http://creativecommons.org/licenses/by/4.0/>).

- <sup>1</sup> Graduate Program of Natural Resources Engineering of Amazon, Rua Corrêa N° 1, Campus Profissional-UFPA, Belém 66075-110, Brazil; douglascastro87@hotmail.com (D.A.R.d.C.); harold\_lr@hotmail.com (H.J.d.S.R.); lucas.bernar7@gmail.com (L.P.B.); marcelo.santos@ufpa.edu.br (M.C.S.)
  - <sup>2</sup> Graduate Program of Chemical Engineering, Rua Corrêa N° 1, Campus Profissional-UFPA, Belém 66075-110, Brazil; guerreirolauro@hotmail.com
  - <sup>3</sup> Hochschule für Technik und Wirtschaft Berlin, Wilhelminenhofstrasse 75A, Berlin 12459, Germany; jonatan-bremer-berlin@web.de
  - <sup>4</sup> Faculty of Sanitary and Environmental Engineering, Rua Corrêa N° 1, Campus Profissional-UFPA, Belém 66075-900, Brazil; helioalmeida@ufpa.br
  - <sup>5</sup> Graduate Program of Civil Engineering, Rua Corrêa N° 1, Campus Profissional-UFPA, Belém 66075-110, Brazil
  - <sup>6</sup> Faculty of Chemical Engineering-UEA, Avenida Darcy Vargas N°. 1200, Manaus 69050-020, Brazil; sjunior@uea.edu.br
  - <sup>7</sup> Laboratory of Catalyst Preparation and Catalytic Cracking, Section of Chemical Engineering-IME, Praça General Tibúrcio No. 80, Rio de Janeiro 22290-270, Brazil; luiz@ime.eb.br
- \* Correspondence: machado@ufpa.br; Tel.: +55-91-984-620-325

**Abstract:** This work investigates the effect of production scales (laboratory, bench, and pilot) by pyrolysis of Açaí (*Euterpe oleracea* Mart.) seeds at 450 °C and 1.0 atmosphere, on the yields of reaction products and acid value of bio-oils. The experiments were carried out in batch mode using a laboratory scale reactor of 143 mL, a bench scale reactor of 1.5 L, and a pilot scale reactor of 143 L (≈1:10:1000). The bio-oil was obtained in pilot scale, fractionated by distillation to produce biofuel-like fractions. The distillation of bio-oil was carried out in a laboratory column. The physical-chemistry properties (density, kinematic viscosity, acid value, and refractive index) of bio-oils and distillation fractions were determined. The qualitative analysis was determined by FT-IR and the chemical composition by GC-MS. The pyrolysis showed bio-oil yields from 4.37 to 13.09 (wt.%), decreasing with reactor volume. The acid value of bio-oils varied from 68.31 to 70.26 mg KOH/g. The distillation of bio-oil produced gasoline, light kerosene, and kerosene-like fuel fractions, and the yields were 16.16, 19.56, and 41.89 (wt.%), respectively. The physical-chemistry properties of distillation fractions increase with temperature. The FT-IR analysis of bio-oils and distillation fractions identified the presence of functional groups characteristic of hydrocarbons (alkenes, alkanes, aromatics, and aromatics rings) and oxygenates (carboxylic acids, ketones, esters, ethers, alcohols, phenols). The GC-MS identified 48.24 (area.%) hydrocarbons and 51.76 (area.%) oxygenates in the bio-oil produced in bench scale and 21.52 (area.%) hydrocarbons and 78.48 (area.%) oxygenates in the bio-oil produced in pilot scale. The gasoline-like fraction was composed by 64.0 (area.%) hydrocarbons and 36.0 (area.%) oxygenates, light kerosene-like fraction by 66.67 (area.%) hydrocarbons and 33.33 (area.%) oxygenates, and kerosene-like fraction by 19.87 (area.%) hydrocarbons and 81.13 (area.%) oxygenates.

**Keywords:** Açaí; residual seeds; pyrolysis; bio-oil; distillation; gasoline; light kerosene; kerosene-like fuel

**Table S1.** Classes of compounds, summation of peak areas, CAS number, and retention times of chemical compounds identified by CG-MS in bio-oil obtained by pyrolysis of Açai seeds at 450 °C and 1.0 atmosphere, in pilot scale.

| Class of Compounds: Chemical Compounds    | RT (min) | CAS        | $\omega$ (Area.%) |
|-------------------------------------------|----------|------------|-------------------|
| <b>Alkanes</b>                            |          |            |                   |
| Undecane                                  | 10.622   | 1120-21-4  | 1.124             |
| Tridecane                                 | 13.870   | 629-50-5   | 2.481             |
| Pentadecane                               | 16.744   | 629-62-9   | 2.290             |
| Dodecane, 5,8-diethyl                     | 19.326   | 24251-86-3 | 1.626             |
| $\Sigma$ (Area.%) =                       |          |            | <b>7.521</b>      |
| <b>Alkenes</b>                            |          |            |                   |
| 6-Tridecene, (Z)-                         | 1.626    | 6508-77-6  | 2.118             |
| $\Sigma$ (Area.%) =                       |          |            | <b>2.118</b>      |
| <b>Cycloalkenes</b>                       |          |            |                   |
| Megastigma-4,6(E), 8 (Z)-trien            | 13.440   | 5298-13-5  | 1.847             |
| $\Sigma$ (Area.%) =                       |          |            | <b>1.847</b>      |
| <b>Aromatic Hydrocarbons</b>              |          |            |                   |
| Naphthalene                               | 12.262   | 91-20-3    | 4.399             |
| Naphthalene, 1-methyl                     | 14.046   | 90-12-0    | 2.390             |
| 1H-Indene, 1-ethylidene                   | 14.296   | 2471-83-2  | 3.249             |
| $\Sigma$ (Area.%) =                       |          |            | <b>10.038</b>     |
| <b>Esters</b>                             |          |            |                   |
| Undecanoic acid, 10-methyl-, methyl ester | 17.049   | 5129-56-6  | 1.096             |
| Methyl tetradecanoate                     | 19.620   | 124-10-7   | 2.969             |
| $\Sigma$ (Area.%) =                       |          |            | <b>4.065</b>      |
| <b>Carboxylic Acids</b>                   |          |            |                   |
| Dodecanoic acid                           | 17.648   | 334-48-5   | 4.307             |
| Tetradecanoic acid                        | 20.677   | 544-63-8   | 4.216             |
| $\Sigma$ (Area.%) =                       |          |            | <b>8.523</b>      |
| <b>Ketones</b>                            |          |            |                   |
| 2-Pentanone, 4-hydroxy-4-methyl           | 5.886    | 123-42-2   | 1.878             |
| 2-Cyclopenten-1-one, 2,3-dimethyl         | 9.552    | 1121-05-7  | 1.655             |
| $\Sigma$ (Area.%) =                       |          |            | <b>3.533</b>      |
| <b>Phenols</b>                            |          |            |                   |
| Phenol                                    | 8.469    | 108-95-2   | 15.932            |
| Phenol, 2-methoxy                         | 10.446   | 90-05-1    | 4.583             |
| Phenol, 2,6-dimethyl                      | 10.805   | 576-26-1   | 1.991             |
| Phenol, 2,4-dimethyl                      | 11.469   | 105-67-9   | 2.034             |
| Phenol, 2,5-dimethyl                      | 11.502   | 95-87-4    | 2.215             |
| Phenol, 3,4-dimethyl                      | 11.821   | 95-65-8    | 3.845             |
| Phenol, 4-ethyl-2-methoxy                 | 13.571   | 2785-89-9  | 4.567             |
| $\Sigma$ (Area.%) =                       |          |            | <b>35.167</b>     |
| <b>Cresols</b>                            |          |            |                   |
| p-Cresol                                  | 9.818    | 108-39-4   | 6.331             |
| m-Cresol                                  | 10.198   | 106-44-5   | 11.054            |
| Cresol                                    | 12.210   | 93-51-3    | 3.141             |
| $\Sigma$ (Area.%) =                       |          |            | <b>20.526</b>     |
| <b>Furans</b>                             |          |            |                   |
| Benzofuran, 2-methyl                      | 10.879   | 4265-26-2  | 1.879             |
| Furan, 2-(2 furanylmethyl)-5-methyl       | 11.946   | 13678-51-8 | 2.089             |
| Benzofuran, 4,7-dimethyl                  | 12.700   | 28715-26-6 | 1.783             |
| $\Sigma$ (Area.%) =                       |          |            | <b>5.751</b>      |
| <b>Aldehyds</b>                           |          |            |                   |
| Cinnamaldehyde, $\beta$ -methyl-          | 12.654   | 1196-67-4  | 0.910             |
| $\Sigma$ (Area.%) =                       |          |            | <b>0.910</b>      |

**Table S2.** Classes of compounds, summation of peak areas, CAS number, and retention times of chemical compounds identified by CG-MS in gasoline-like fraction (40–175 °C) after distillation of bio-oil obtained by pyrolysis of Açai seeds at 450 °C and 1.0 atmosphere, in pilot scale.

| Class of Compounds: Chemical Compounds                         | RT (min) | CAS         | $\omega$ (Area.%) |
|----------------------------------------------------------------|----------|-------------|-------------------|
| <b>Alkanes</b>                                                 |          |             |                   |
| Undecane                                                       | 10.548   | 1120-21-4   | 3.19              |
| Tridecane                                                      | 13.794   | 629-50-5    | 3.93              |
| Tetradecane                                                    | 15.276   | 629-59-4    | 0.75              |
| Pentadecane                                                    | 16.744   | 629-62-9    | 1.55              |
| $\Sigma$ (Area.%) =                                            |          |             | <b>9.41</b>       |
| <b>Alkenes</b>                                                 |          |             |                   |
| p-Mentha-1,5,8-triene                                          | 9.861    | 21195-59-5  | 2.254             |
| 1-Undecene                                                     | 10.402   | 821-95-4    | 2.776             |
| 1-Dodecene                                                     | 12.088   | 112-41-4    | 3.034             |
| Bicyclo[6.4.0]dodeca-9,11-diene                                | 13.291   | -           | 0.614             |
| 1-Tridecene                                                    | 13.672   | 2437-56-1   | 2.098             |
| Bicyclo[4.4.1]undeca-1,3,5,7,9-pentaene                        | 14.286   | 2443-46-1   | 1.380             |
| 1-Tetradecene                                                  | 15.167   | 1120-36-1   | 1.111             |
| $\Sigma$ (Area.%) =                                            |          |             | <b>13.267</b>     |
| <b>Aromatic Hydrocarbons</b>                                   |          |             |                   |
| Benzene, 1,3-dimethyl-                                         | 6.247    | 108-38-3    | 0.578             |
| Benzene, propyl-                                               | 7.995    | 103-65-1    | 0.516             |
| Benzene, 1-ethyl-3-methyl-                                     | 8.128    | 620-14-4    | 0.686             |
| Benzene, 1-ethyl-2-methyl-                                     | 8.193    | 611-14-3    | 0.593             |
| Trimethylbenzene                                               | 8.283    | 108-67-8    | 0.566             |
| Benzene, (1-methylethyl)-                                      | 8.454    | 98-82-8     | 1.050             |
| Benzene, 1,2,4-trimethyl-                                      | 8.738    | 95-63-6     | 2.107             |
| Benzene, 1-ethenyl-2-methyl-                                   | 8.770    | 611-15-4    | 2.709             |
| Benzene, 1,2,3-trimethyl-                                      | 9.255    | 526-73-8    | 1.297             |
| Benzene, pentyl-                                               | 11.607   | 538-68-1    | 2.205             |
| Benzene, (1-methyl-2-propynyl)-                                | 11.646   | 4544-28-9   | 0.875             |
| Benzene, (1-methyl-2-cyclopropen-1-yl)-                        | 11.685   | 65051-83-4  | 1.441             |
| o-Xylene                                                       | 6.413    | 95-47-6     | 1.136             |
| p-Xylene                                                       | 6.834    | 106-42-3    | 2.080             |
| 6,7-Dimethyl-3,5,8,8a-tetrahydro-1H-2-benzopyran               | 10.368   | 110028-10-9 | 1.243             |
| 2,4-Dimethylstyrene                                            | 11.371   | 2234-20-0   | 0.703             |
| 1H-Indene, 1-methyl-                                           | 11.547   | 767-58-8    | 1.830             |
| Naphthalene                                                    | 12.217   | 91-20-3     | 10.081            |
| 1H-Indene, 2,3-dihydro-4,7-dimethyl-                           | 12.533   | 6682-71-9   | 0.760             |
| Benzocycloheptatriene                                          | 14.038   | 264-09-5    | 1.401             |
| Indane                                                         | 9.516    | 496-11-7    | 0.763             |
| Indene                                                         | 9.699    | 95-13-6     | 6.702             |
| $\Sigma$ (Area.%) =                                            |          |             | <b>41.322</b>     |
| <b>Esters</b>                                                  |          |             |                   |
| Hexanoic acid, 2-phenylethyl ester                             | 6.917    | 72934-12-4  | 0.494             |
| 2-Furancarboxylic acid, 3-phenylpropyl ester                   | 8.536    | -           | 0.645             |
| Carbonic acid, octadecyl phenyl ester                          | 8.616    | -           | 3.193             |
| Acetic acid, 2-methylene-bicyclo[3.2.1]oct-6-en-8-yl ester     | 9.379    | -           | 0.644             |
| 1-hydroxy-1,2,3,4-tetrahydronaphthalene trifluoroacetate ester | 11.850   | 134563-46-5 | 0.526             |
| $\Sigma$ (Area.%) =                                            |          |             | <b>5.502</b>      |

|                                                                                      |     |        |             |               |
|--------------------------------------------------------------------------------------|-----|--------|-------------|---------------|
| <b>Ketones</b>                                                                       |     |        |             |               |
| 5H-Inden-5-one, 1,2,3,6,7,7a-hexahydro-                                              |     | 9.975  | 1489-28-7   | 1.630         |
| Tricyclo[4.2.1.1(2,5)]deca-3,7-dien-9-one, 10-hydroxy-10-methyl-                     | 10- | 11.767 | 70220-88-1  | 0.983         |
| $\Sigma$ (Area.%) =                                                                  |     |        |             | <b>2.613</b>  |
| <b>Phenols</b>                                                                       |     |        |             |               |
| Phenol                                                                               |     | 8.704  | 108-95-2    | 0.741         |
| 2-(2-Hydroxyphenyl)buta-1,3-diene                                                    |     | 12.450 | 90-05-1     | 0.608         |
| $\Sigma$ (Area.%) =                                                                  |     |        |             | <b>1.349</b>  |
| <b>Alcohols</b>                                                                      |     |        |             |               |
| 2-heptanol                                                                           |     | 5.906  | 543-49-7    | 0.366         |
| 1-Hexadecanol, 2-methyl-                                                             |     | 16.583 | 2490-48-4   | 0.849         |
| Carveol                                                                              |     | 10.263 | 99-48-9     | 1.259         |
| 2-Indanol                                                                            |     | 9.760  | 4254-29-9   | 0.568         |
| 2,6,8-Trimethylbicyclo[4.2.0]oct-2-ene-1,8-diol                                      |     | 10.484 | -           | 1.505         |
| 1-Naphthalenol, 1,2,3,4-tetrahydro-3-methyl-                                         |     | 13.388 | 3344-45-4   | 0.427         |
| 2-Naphthalenol, 1,2-dihydro-, acetate \ 3-Methoxymethoxy-1,5,5-trimethyl-cyclohexene |     | 12.300 | 132316-80-4 | 1.073         |
| $\Sigma$ (Area.%) =                                                                  |     |        |             | <b>6.047</b>  |
| <b>Furans</b>                                                                        |     |        |             |               |
| Benzofuran                                                                           |     | 8.816  | 271-89-6    | 3.746         |
| Benzofuran, 2-methyl                                                                 |     | 10.838 | 4265-25-2   | 4.997         |
| Furan, 2-(2 furanylmethyl)-5-methyl                                                  |     | 11.922 | 13678-51-8  | 1.209         |
| Benzofuran, 4,7-dimethyl                                                             |     | 12.739 | 28715-26-6  | 3.287         |
| $\Sigma$ (Area.%) =                                                                  |     |        |             | <b>13.239</b> |
| <b>Aldehyds</b>                                                                      |     |        |             |               |
| Myrtenal                                                                             |     | 10.034 | 564-94-3    | 1.724         |
| Cinnamaldehyde                                                                       |     | 12.654 | 104-55-2    | 5.523         |
| $\Sigma$ (Area.%) =                                                                  |     |        |             | <b>7.247</b>  |

**Table S3.** Classes of compounds, summation of peak areas, CAS number, and retention times of chemical compounds identified by CG-MS in light kerosene-like fraction (175–200 °C) after distillation of bio-oil obtained by pyrolysis of Açaí seeds at 450 °C and 1.0 atmosphere, in pilot scale.

| Class of Compounds: Chemical Compounds | RT (min) | CAS         | $\alpha$ (Area.%) |
|----------------------------------------|----------|-------------|-------------------|
| <b>Alkanes</b>                         |          |             |                   |
| Undecane                               | 10.558   | 1120-21-4   | 2.115             |
| Dodecane                               | 12.222   | 112-40-3    | 1.608             |
| Tridecane                              | 13.793   | 629-50-5    | 7.177             |
| Tetradecane                            | 15.266   | 629-59-4    | 2.550             |
| Pentadecane                            | 16.668   | 629-62-9    | 8.424             |
| Hexadecane                             | 17.987   | 544-76-3    | 1.236             |
| Heptadecane                            | 19.266   | 629-78-7    | 8.974             |
| Tetradacane 2,6,10-trimethyl-          | 20.485   | 14905-56-7  | 0,562             |
| $\Sigma$ (Area.%) =                    |          |             | <b>32.646</b>     |
| <b>Alkenes</b>                         |          |             |                   |
| 1-Dodecene                             | 12.096   | 112-41-4 -6 | 2.077             |
| 1-Tridecene                            | 13.668   | 2437-56-1   | 1.225             |
| 1-Tetradecene                          | 15.157   | 1120-36-1   | 1.295             |
| 1-Pentadecene                          | 16.576   | 13360-61-7  | 3.279             |
| 1-Heptadecene                          | 17.896   | 6765-39-5   | 1.105             |
| 3-Heptadecene,(Z)-                     | 18.991   | -           | 2.914             |

|                                                                                                                   |        |            |               |
|-------------------------------------------------------------------------------------------------------------------|--------|------------|---------------|
| 8-Heptadecene                                                                                                     | 19.060 | 2579-04-6  | 5.701         |
| $\Sigma$ (Area.%) =                                                                                               |        |            | <b>17.596</b> |
| <b>Aromatic Hydrocarbons</b>                                                                                      |        |            |               |
| Naphthalene, 2-methyl-                                                                                            | 14.023 | 91-57-6    | 1.141         |
| Naphthalene, 1-methyl-                                                                                            | 14.265 | 90-12-0    | 1.582         |
| Benzocycloheptatriene                                                                                             | 14.923 | 264-09-5   | 1.633         |
| Naphthalene, 1-ethyl-                                                                                             | 15.483 | 1127-76-0  | 2.301         |
| Naphthalene, 1,3-dimethyl-                                                                                        | 15.679 | 575-41-7   | 3.739         |
| Naphthalene, 1-(2-propenyl)-                                                                                      | 16.732 | 2489-86-3  | 1.010         |
| Naphthalene, 2-ethyl-                                                                                             | 16.806 | 827-54-3   | 1.997         |
| 1-Isopropenylnaphthalene                                                                                          | 17.145 | 1855-47-6  | 0.848         |
| Fluorene                                                                                                          | 18.197 | 86-73-7    | 1.722         |
| 9H-Fluorene,9-methyl-                                                                                             | 18.415 | 2523-37-7  | 0.445         |
| $\Sigma$ (Area.%) =                                                                                               |        |            | <b>16.418</b> |
| <b>Esters</b>                                                                                                     |        |            |               |
| Dodecanoic acid, methyl ester                                                                                     | 16.987 | 111-82-0   | 3.801         |
| Methyl tetradecanoate                                                                                             | 19.580 | 124-10-7   | 2.358         |
| $\Sigma$ (Area.%) =                                                                                               |        |            | <b>6.159</b>  |
| <b>Carboxylic Acids</b>                                                                                           |        |            |               |
| 4,5-Dichlorothiophene-2-carboxylic acid                                                                           | 14.766 | 31166-29-7 | 1.198         |
| Erucic acid                                                                                                       | 18.864 | 112-86-7   | 0.450         |
| Propanoic acid, 2-methyl-, (dodecahydro-6a-hydroxy-9a-methylene-2,9-dioxoazuleno                                  | 19.435 | 33649-17-1 | 0.925         |
| Cis-5,8,11,14,17-Eicosapentaenoic acid                                                                            | 20.403 | 10417-94-4 | 0.692         |
| $\Sigma$ (Area.%) =                                                                                               |        |            | <b>3.265</b>  |
| <b>Ketones</b>                                                                                                    |        |            |               |
| Cyclopenta[1,3]cyclopropa[1,2]cyclohepten-3(3aH)-one, 1,2,3b,6,7,8-hexahydro                                      | 14.851 | 91531-58-7 | 1.013         |
| 4-(2,4,4-Trimethyl-cyclohexa-1,5-dienyl)-but-3-en-2-one                                                           | 15.980 | -          | 0.966         |
| Cyclopenta[1,3]cyclopropa[1,2]cyclohepten-3(3aH)-one, 1,2,3b,6,7,8-hexahydro-1,2,3b                               | 16.330 | 91531-58-7 | 0.879         |
| 2,4,6-Cycloheptatrien-1-one,2-hydroxy-5-(3-methyl-2-butenyl)-4-(1-methylethenyl)-                                 | 16.887 | 552-96-5   | 1.382         |
| $\Sigma$ (Area.%) =                                                                                               |        |            | <b>4.240</b>  |
| <b>Phenols</b>                                                                                                    |        |            |               |
| Phenol, 2,5-dimethyl-                                                                                             | 11.725 | 95-87-4    | 1.168         |
| Phenol, 3,4-dimethyl-                                                                                             | 12.015 | 95-65-8    | 1.274         |
| Phenol, 3-ethyl-5-methyl-                                                                                         | 13.591 | 698-71-5   | 4.686         |
| $\Sigma$ (Area.%) =                                                                                               |        |            | <b>7.128</b>  |
| <b>Alcohols</b>                                                                                                   |        |            |               |
| 9-Methyltricyclo[4.2.1.1(2,5)]deca-3,7-diene-9,10-diol                                                            | 14.176 | 78323-73-6 | 0.789         |
| 1-Naphthalenol, 1,2,3,4-tetrahydro-2,5,8-trimethyl-                                                               | 16.162 | 55591-08-7 | 1.862         |
| Bicyclo[4.1.0]heptan-2-ol,1 $\beta$ -(3-methyl-1,3-butadienyl)-2 $\alpha$ ,6 $\beta$ -dimethyl-3 $\beta$ -acetoxy | 16.378 | -          | 2.696         |
| Cyclopentanol, 3,3,4-trimethyl-4-p-tolyl-, (R,R)-(+)-                                                             | 16.475 | 19902-38-6 | 1.604         |
| 1-Hexadecanol, 2-methyl-                                                                                          | 19.172 | 2490-48-4  | 1.348         |
| $\Sigma$ (Area.%) =                                                                                               |        |            | <b>8.299</b>  |
| <b>Furans</b>                                                                                                     |        |            |               |
| Dibenzofuran                                                                                                      | 17.299 | 132-64-9   | 2.387         |
| $\Sigma$ (Area.%) =                                                                                               |        |            | <b>2.387</b>  |
| <b>Aldehyds</b>                                                                                                   |        |            |               |

|                                                                             |        |           |       |
|-----------------------------------------------------------------------------|--------|-----------|-------|
| 2-((2R,4aR,8aS)-4a-Methyl-8-methylenedecahydronaphthalen-2-yl)acrylaldehyde | 17.791 | 3650-40-6 | 1.864 |
| $\Sigma$ (Area.%) =                                                         |        |           | 1.864 |

**Table S4.** Classes of compounds, summation of peak areas, CAS number, and retention times of chemical compounds identified by CG-MS in kerosene-like fraction (200–215 °C) after distillation of bio-oil obtained by pyrolysis of Açaí seeds at 450 °C and 1.0 atmosphere, in pilot scale.

| Class of Compounds: Chemical Compounds                         | RT (min) | CAS          | $\omega$ (Area.%) |
|----------------------------------------------------------------|----------|--------------|-------------------|
| <b>Alkanes</b>                                                 |          |              |                   |
| Tridecane                                                      | 13.792   | 629-50-5     | 2.023             |
| Tetradecane                                                    | 15.276   | 629-59-4     | 0.752             |
| Pentadecane                                                    | 16.675   | 629-62-9     | 1.422             |
| $\Sigma$ (Area.%) =                                            |          |              | 4.20              |
| <b>Alkenes</b>                                                 |          |              |                   |
| Tetracyclo[5.3.0.0.0<2,6>.0<3,10>]deca-4,8-diene               | 11.546   | 34324-40-8   | 0.981             |
| Bicyclo[6.4.0]dodeca-9,11-diene                                | 13.288   | -            | 0.389             |
| 1-Tetradecene                                                  | 15.166   | 1120-36-1    | 1.027             |
| 1-Pentadecene                                                  | 16.586   | 13360-61-7   | 0.390             |
| $\Sigma$ (Area.%) =                                            |          |              | 2.787             |
| <b>Aromatic Hydrocarbons</b>                                   |          |              |                   |
| Benzene, 1-ethynyl-4-methyl-                                   | 9.708    | 766-97-2     | 1.148             |
| 1H-Indene, 2,3-dihydro-4-methyl-                               | 11.370   | 824-22-6     | 0.288             |
| Naphthalene                                                    | 12.213   | 91-20-3      | 9.719             |
| Naphthalene, 1-methyl                                          | 14.043   | 90-12-0      | 0.842             |
| Naphthalene, 2-methyl-                                         | 14.290   | 91-57-6      | 0.883             |
| $\Sigma$ (Area.%) =                                            |          |              | 12.880            |
| <b>Alcohol</b>                                                 |          |              |                   |
| 1,3-Cyclohexadiene-1-methanol, $\alpha$ ,2,6,6-tetramethyl-    | 11.764   | 102676-97-1  | 0.773             |
| 9-Heptadecene-4,6-diyn-3-ol                                    | 13.386   | 1242413-82-6 | 0.187             |
| $\Sigma$ (Area.%) =                                            |          |              | 0.960             |
| <b>Ether</b>                                                   |          |              |                   |
| p-Propargyloxytoluene                                          | 12.431   | 5651-90-1    | 0.803             |
| $\Sigma$ (Area.%) =                                            |          |              | 0.803             |
| <b>Ketones</b>                                                 |          |              |                   |
| 2-Cyclopenten-1-one, 2-methyl-                                 | 7.237    | 1120-73-6    | 0.447             |
| Ethanone, 1-(2-furanyl)-                                       | 7.366    | 1192-62-7    | 0.178             |
| 2-Cyclopenten-1-one, 2,3-dimethyl                              | 9.609    | 1121-05-7    | 0.735             |
| Benzoin                                                        | 10.144   | 119-53-9     | 0.511             |
| 8-Decen-2-one, 9-methyl-5-methylene-                           | 12.090   | 130876-97-0  | 0.354             |
| Bicyclo[8.2.0]dodecan-11-one, 12,12-dichloro-, (1R*,10S*)-     | 13.672   | 110079-11-3  | 1.078             |
| $\Sigma$ (Area.%) =                                            |          |              | 3.503             |
| <b>Phenols</b>                                                 |          |              |                   |
| Phenol                                                         | 8.860    | 108-95-2     | 31.258            |
| Phenol, 2-methyl-                                              | 9.861    | 95-48-7      | 8.621             |
| Phenol, 3-methyl-                                              | 9.995    | 108-39-4     | 13.132            |
| Phenol, 2-methoxy                                              | 10.442   | 90-05-1      | 5.554             |
| Phenol, 2,5-dimethyl                                           | 11.645   | 95-87-4      | 2.229             |
| $\Sigma$ (Area.%) =                                            |          |              | 60.794            |
| <b>Ester</b>                                                   |          |              |                   |
| 1-hydroxy-1,2,3,4-tetrahydronaphthalene trifluoroacetate ester | 11.846   | 134563-46-5  | 2.065             |
| $\Sigma$ (Area.%) =                                            |          |              | 2.065             |
| <b>Furans</b>                                                  |          |              |                   |

---

|                                      |        |            |              |
|--------------------------------------|--------|------------|--------------|
| Benzofuran, 2-methyl-                | 10.831 | 4265-25-2  | 3.546        |
| Furan, 2-(2 furanylmethyl)-5-methyl- | 11.914 | 13678-51-8 | 0.750        |
| Benzofuran, 4,7-dimethyl-            | 12.486 | 28715-26-6 | 4.693        |
| $\Sigma$ (Area.%) =                  |        |            | <b>8.989</b> |
| <b>Aldehyds</b>                      |        |            |              |
| 2-Propenal, 3-phenyl-                | 10.753 | 104-55-2   | 3.219        |
| $\Sigma$ (Area.%) =                  |        |            | <b>3.219</b> |

---
